# Supplementary material for: What works for whom, how and why in mental health education for undergraduate health profession students? A realist synthesis protocol
Source: HighWire-hosted journal article supplement (doi:10.1136/bmjopen-2023-078130), 2024-03-01
Supplement: bmjopen-2023-078130supp002_data_supplement.pdf [file bmjopen-2023-078130supp002_data_supplement.pdf]

**1. PsycInfo:**

undergraduate\* OR student\* OR trainee\* OR bachelor\* OR master\* OR "pre registration")

N2

healthcare OR "health care" OR pharmacy OR medicine OR physiotherapy OR "social work"

OR

occupational therapy" OR nursing))

OR

INDEX: **Undergraduate Education**

AND

INDEX: **Mental Health Education**

OR

mental health" OR "mental illness" OR "mental disorder\*" OR depression OR "anxiety disorder\*" OR psychosis OR "eating disorder" OR suicide OR "substance use disorder")

AND

medical OR clinical OR paramedical OR "allied health")

N1

education OR training OR learning OR teaching OR curriculum OR curricula))

OR

INDEX: Health Education

NOT

("student welfare" OR wellbeing)

**2. CINAHL:**

mental health" OR "mental illness" OR "mental disorder\*" OR depression OR "anxiety disorder\*" OR psychosis OR "eating disorder" OR suicide OR "substance use disorder")

OR

INDEX: Mental Health

AND

medical OR clinical OR paramedical OR "allied health")

N1 education OR training OR learning OR teaching OR curriculum OR curricula))

OR

INDEX: **Education, Medical")**

OR

INDEX: Education, Nursing")

OR

INDEX: Education, Nurse Anesthesia

INDEX: Education, Nursing, Associate")

OR

INDEX: Education, Nursing, Baccalaureate

OR

INDEX: Education, Nursing, Practical

OR

INDEX: Education, Pharmacy")

OR

INDEX: Education, Podiatry

OR

INDEX: Education, Midwifery

AND

undergraduate\* OR student\* OR trainee\* OR bachelor\* OR master\* OR "pre registration")

N2

healthcare OR "health care" OR pharmacy OR medicine OR physiotherapy OR "social work" OR "occupational therapy" OR nursing)) OR

INDEX: "Students, Undergraduate")

OR

INDEX: Students, Health Occupations+")))))

NOT ("student welfare" OR wellbeing)

### 3. MEDLINE:

mental health" OR "mental illness" OR "mental disorder\*" OR depression OR "anxiety disorder\*" OR psychosis OR "eating disorder" OR suicide OR "substance use disorder

OR

MESH: ((MH "Mental Health")))

AND

((((medical OR clinical OR paramedical OR "allied health")

N1

(education OR training OR learning OR teaching OR curriculum OR curricula))

OR

MESH ((MH "Education, Medical"))

OR

MESH (MH "Teaching Rounds")

OR

MESH (MH "Education, Medical, Undergraduate")

OR

MESH (MH "Education, Nursing")

OR

MESH (MH "Education, Nursing, Associate")

OR

MESH (MH "Education, Pharmacy"))))

AND

((((undergraduate\* OR student\* OR trainee\* OR bachelor\* OR master\* OR "pre registration")

N2

(healthcare OR "health care" OR pharmacy OR medicine OR physiotherapy OR "social work" OR "occupational therapy" OR nursing))

OR

MESH ((MH "Students, Health Occupations+"))))

NOT ("student welfare" OR wellbeing)

#### 4. ERIC

mental health education AND health profession student OR undergraduate student OR allied health profession student

INDEX: Allied Health Occupations Education

INDEX: Curriculum Development

INDEX: Medical Education

#### 5. Cochrane:

- #1 "mental health" OR "mental illness" OR "mental disorder" OR depression OR "anxiety disorder" OR psychosis OR "eating disorder" OR suicide OR "substance use disorder" 138646
- #2 (medical or clinical or paramedical or "allied health") NEAR/2 (education or training or learning or teaching or curriculum or curricula) 15400
- #3 (undergraduate\* or student\* or trainee\* or bachelor\* or master\* or "pre registration") NEAR/3 (healthcare or "health care" or pharmacy or medicine or physiotherapy or "social work" or "occupational therapy" or nursing) 4627
- #4 MeSH descriptor: [Mental Health] explode all trees 3626
- #5 MeSH descriptor: [Education, Medical] this term only 587
- #6 MeSH descriptor: [Education, Medical, Undergraduate] explode all trees 994
- #7 MeSH descriptor: [Education, Nursing] this term only 276
- #8 MeSH descriptor: [Education, Nursing, Associate] explode all trees 25
- #9 MeSH descriptor: [Education, Pharmacy] this term only 98
- #10 MeSH descriptor: [Students, Health Occupations] explode all trees 2615
- #11 #5 OR #6 OR #7 OR #8 OR #9 1950
- #12 #1 OR #4 138646
- #13 #2 or #11 15664
- #14 #3 or #10 6269
- #15 #12 and #13 and #14 99
